# Supplementary material for: Prevalence, Infectious Characteristics and Genetic Diversity of Staphylococcus aureus and Methicillin-Resistant Staphylococcus aureus (MRSA) in Two Raw-Meat Processing Establishments in Northern Greece
Source: MDPI journal article supplement (doi:10.3390/pathogens11111370), 2022-11-17
Supplement: s1 [file s1]

**Table S1.** Primers used in this study for the detection of molecular characterization genes, toxin genes and methicillin resistance genes

|                                  | Primers* | Primer sequence (5'-3')         | Amplified product size (bp) | Reference |
|----------------------------------|----------|---------------------------------|-----------------------------|-----------|
| Molecular characterization genes |          |                                 |                             |           |
|                                  | coa F    | ATAGAGATGCTGGTAAGG              | 500-650                     | [82]      |
|                                  | coa R    | GCTTCCGATTGTTTCGATGC            |                             |           |
|                                  | nuc F    | GGCAATTGTTTCAATATTAC            | 416                         | [83]      |
|                                  | nuc R    | TTTTATTGCAATTTCTACC             |                             |           |
| Toxin genes                      |          |                                 |                             |           |
|                                  | sea F    | GCAGGGAACAGCTTTAGGC             | 521                         | [84]      |
|                                  | sea R    | GTTCTGTAGAAGTATGAAACACG         |                             |           |
|                                  | seb F    | ACATGTAAT TTT GATATTCGCACTG     | 667                         | [84]      |
|                                  | seb R    | TGCAGGCATCATGTCATACCA           |                             |           |
|                                  | sec F    | CTTGTATGTATGGAGGAATAACAA        | 284                         | [84]      |
|                                  | sec R    | TGCAGGCATCATATCATACCA           |                             |           |
|                                  | sed F    | GTGGTGAAATAGATAGGACTGC          | 385                         | [84]      |
|                                  | sed R    | ATATGAAGGTGCTCTGTGG             |                             |           |
|                                  | see F    | TACCAATTAACCTTGTGGATAGAC        | 171                         | [84]      |
|                                  | see R    | CTCTTTGCACCTTACCGC              |                             |           |
|                                  | seg F    | CGT CTC CAC CTG TTG AAG G       | 328                         | [84]      |
|                                  | seg R    | CCA AGT GAT TGT CTA TTG TCG     |                             |           |
|                                  | seh F    | CAA CTG CTG ATT TAG CTC AG      | 359                         | [84]      |
|                                  | seh R    | GTC GAA TGA GTA ATC TCT AGG     |                             |           |
|                                  | sei F    | CAA CTC GAA TTT TCA ACA GGT ACC | 466                         | [84]      |
|                                  | sei R    | CAG GCA GTC CAT CTC CTG         |                             |           |
|                                  | sej F    | CAT CAG AAC TGT TGT TCC GCT AG  | 142                         | [84]      |
|                                  | sej R    | CTG AAT TTT ACC ATC AAA GGT A   |                             |           |
|                                  | tsst F   | GCT TGC GAC AAC TGC TAC AG      | 559                         | [84]      |
|                                  | tsst R   | TGG ATC CGT CAT TCA TTG TTA T   |                             |           |
|                                  | pvl F    | GCTGGACAAAACCTTCTTGAATAT        | 83                          | [85]      |
|                                  | pvl R    | GATAGGACACCAATAAATTCTGGATTG     |                             |           |

|                               |        |                           |     |      |
|-------------------------------|--------|---------------------------|-----|------|
| <b>Methicillin resistance</b> |        |                           |     |      |
| <b>genes</b>                  |        |                           |     |      |
|                               | mecA F | TCACCAGGTTCAAC[Y]CAAAA    | 162 | [85] |
|                               | mecA R | CCTGAATC[W]GCTAATAATATTTC |     |      |
|                               | mecC F | GAAAAAAAGGCTTAGAACGCCTC   | 718 | [85] |
|                               | mecC R | CCTGAATC[W]GCTAATAATATTTC |     |      |

\* F: forward, R: reverse
